# Supplementary material for: Investigation of a sensing approach based on a rapid reduction of azide to selectively measure bioavailability of H2S
Source: Royal Society of Chemistry journal article supplement (doi:10.1039/c6ra20478c), 2016-01-01
Supplement: c6ra20478c1.pdf [file c6ra20478c1.pdf]

## Investigation of a sensing approach based on a rapid reduction of azide to selectively measure bioavailability of H<sub>2</sub>S

Gunwoo Kim,<sup>a</sup> Eunju Jang,<sup>a</sup> Alexis M Page,<sup>b</sup> Ting Ding,<sup>a</sup> Kimberly A. Carlson,<sup>b</sup> and Haishi Cao<sup>a\*</sup>

Department of Chemistry, University of Nebraska at Kearney, Kearney NE 68849, USA  
Department of Biology, University of Nebraska at Kearney, Kearney NE 68849, USA

### Contents:

|                                                         |    |
|---------------------------------------------------------|----|
| Experimental.....                                       | S2 |
| Absorption and emission spectra of 6-amino-2,3-NI.....  | S3 |
| NMR Spectra ( <sup>1</sup> H and <sup>13</sup> C) ..... | S4 |
| High resolution mass spectrometry of AHS and NHS.....   | S8 |

## Experimental

### *Apparatus*

Absorbance spectra were collected by Cary Series Uv-vis Spectrophotometer (Agilent Technologies). Fluorescence measurements were all performed by using a FluoroMax-4 Spectrofluorometer (Horiba Jobin Yvon, USA). All of fluorescence spectra were recorded in a 1 cm quartz cuvette. The excitation and emission slits were set at 2 nm.  $^1\text{H}$  and  $^{13}\text{C}$  NMR spectra were recorded on ( $^1\text{H}$  300MHz,  $^{13}\text{C}$  75MHz) Bruker 300 Ultra-Shield spectrometer at room temperature. A TE2000-S inverted fluorescent microscope (Nikon, Melville, NY) were used for cell imaging.

### *Reagents*

All reagents used for synthesis and measurements were purchased from Sigma-Aldrich (MO, USA), Fisher Scientific (USA) and Acros Organics (USA) in analytical grade and used as received, unless otherwise stated.

### *Cell imaging*

U937 culture. U937 cells (human monocyte cell line; American Type Culture Collection (ATCC), Manassas, VA) were maintained at 37°C with 5% CO<sub>2</sub> in T-25 flasks in RPMI 1640 (ATCC) supplemented with 10% heat-inactivated fetal bovine serum (FBS; Gibco Invitrogen Corporation, Grand Island, NY) and 1% penicillin-streptomycin (ATCC). For imaging, cells were placed in a 50-mL conical tube and centrifuged at 1,000xg for 5 min. The supernatant was removed and the pellet resuspended in 7 mL of supplemented RPMI 1640 medium. The cells were counted using trypan blue (Avocado Research Chemicals Ltd., Lancashire, England) and a hemocytometer (Bright-Line, Horsham, PA) and diluted to a density of  $1 \times 10^6$  cells/mL. Into 8-well chamber slides (Falcon™, Bedford, MA),  $1 \times 10^5$  cells were added to each well. The cells were incubated for 48h. After 48h, the **AHS** sensor was added to three wells at 5 mM, 4 wells at 10 mM, and 1 well did not have the sensor added. This was incubated for 10 min. Following incubation, H<sub>2</sub>S was added to individual wells in concentrations of 0, 2.5, 5, or 10 mM (**AHS** at 5 mM with H<sub>2</sub>S at either 2.5, 5, or 10 mM; **AHS** at 10 mM with H<sub>2</sub>S at either 0, 2.5, 5, or 10 mM; and **AHS** at 0 mM with H<sub>2</sub>S at 10 mM). This was incubated for 10 min. After incubation, the supernatant was removed by aspiration and the slides were mounted (Immu-Mount; Thermo, Pittsburgh, PA). Following mounting of the slides, the cells were visualized using a TE2000-S inverted fluorescent microscope (Nikon, Melville, NY).

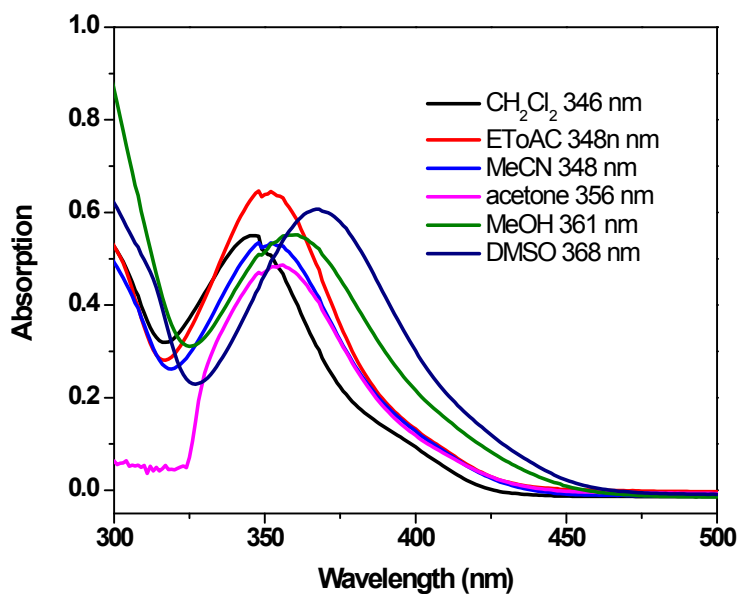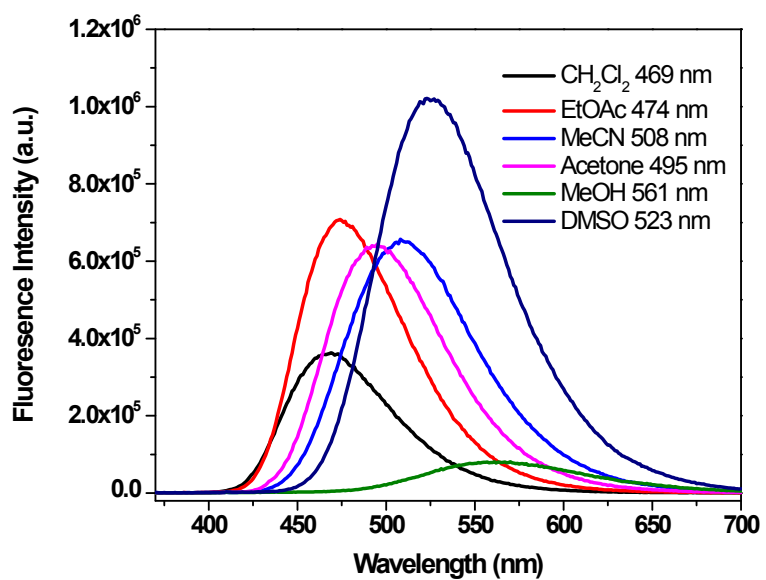

Fig. S1. The absorption and emission spectra of 6-amino-2,3-NI in different solvents at 25 °C.

# Compound 1

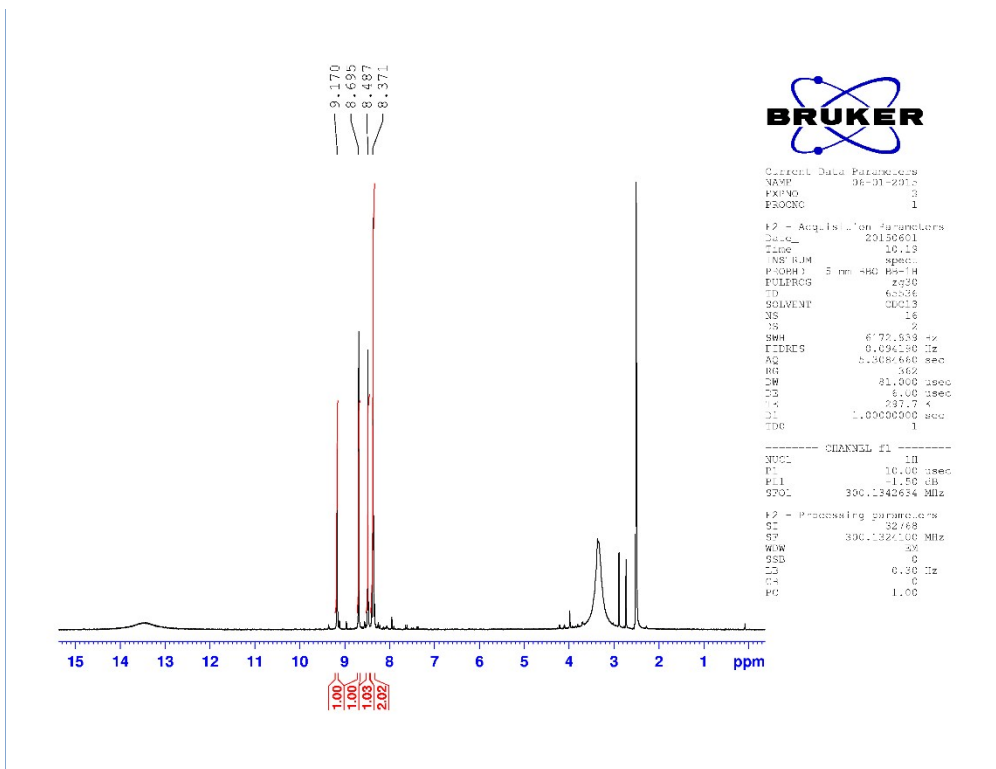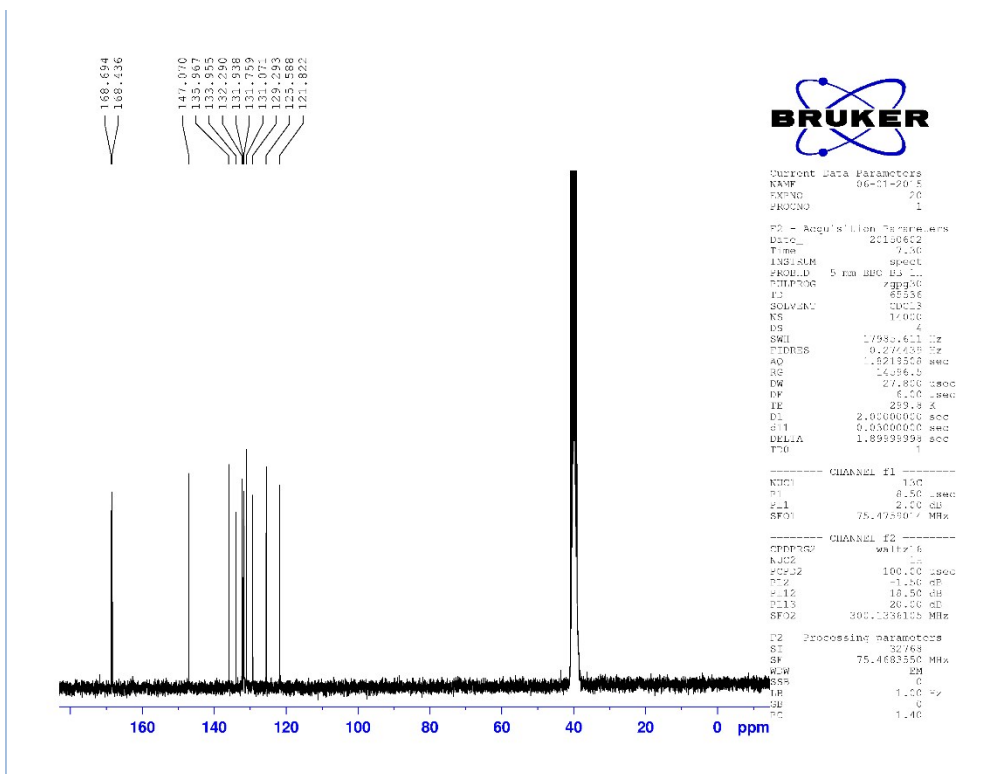

NHS

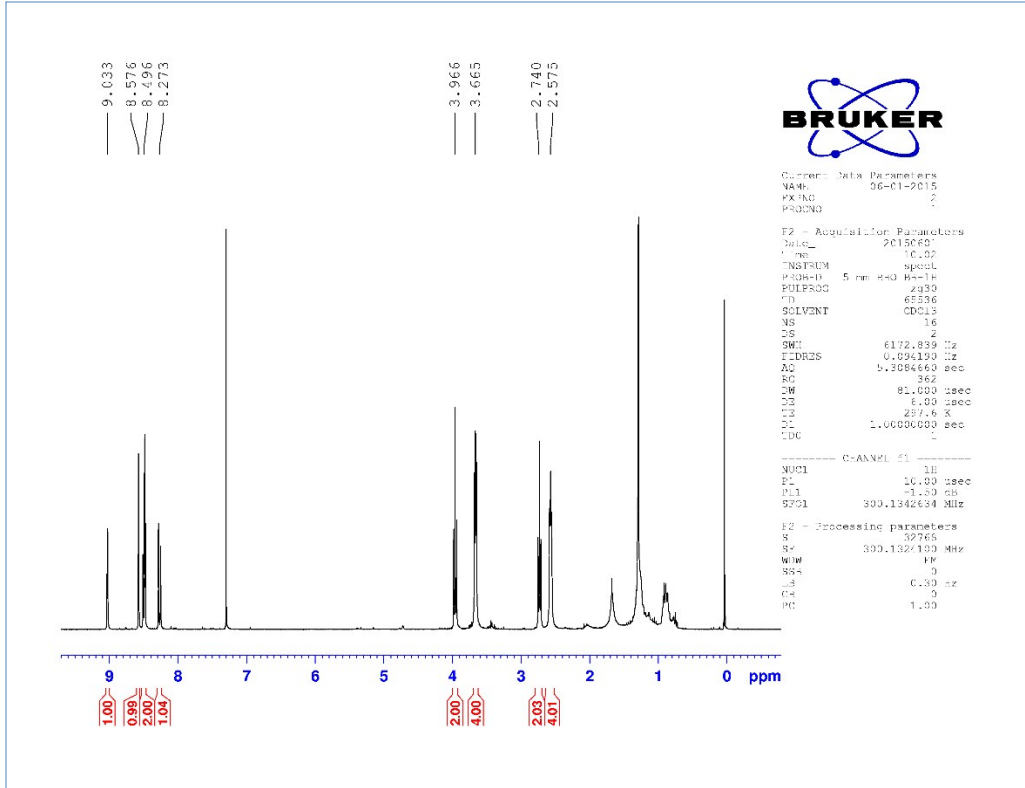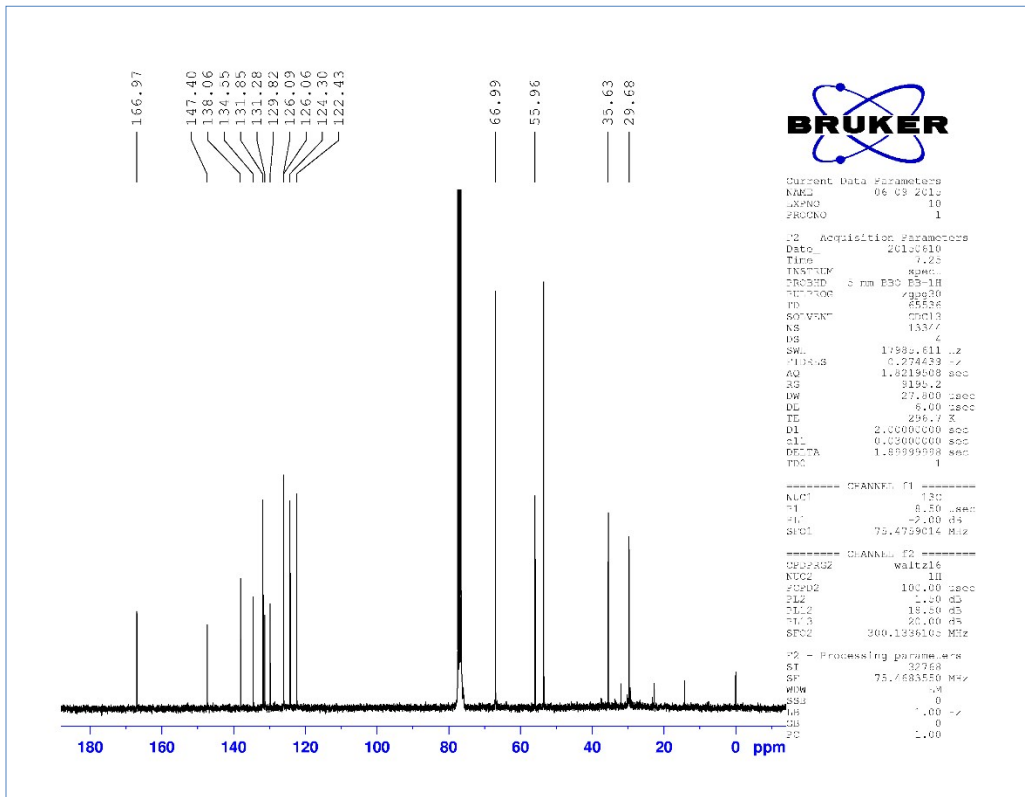

# Compound 2

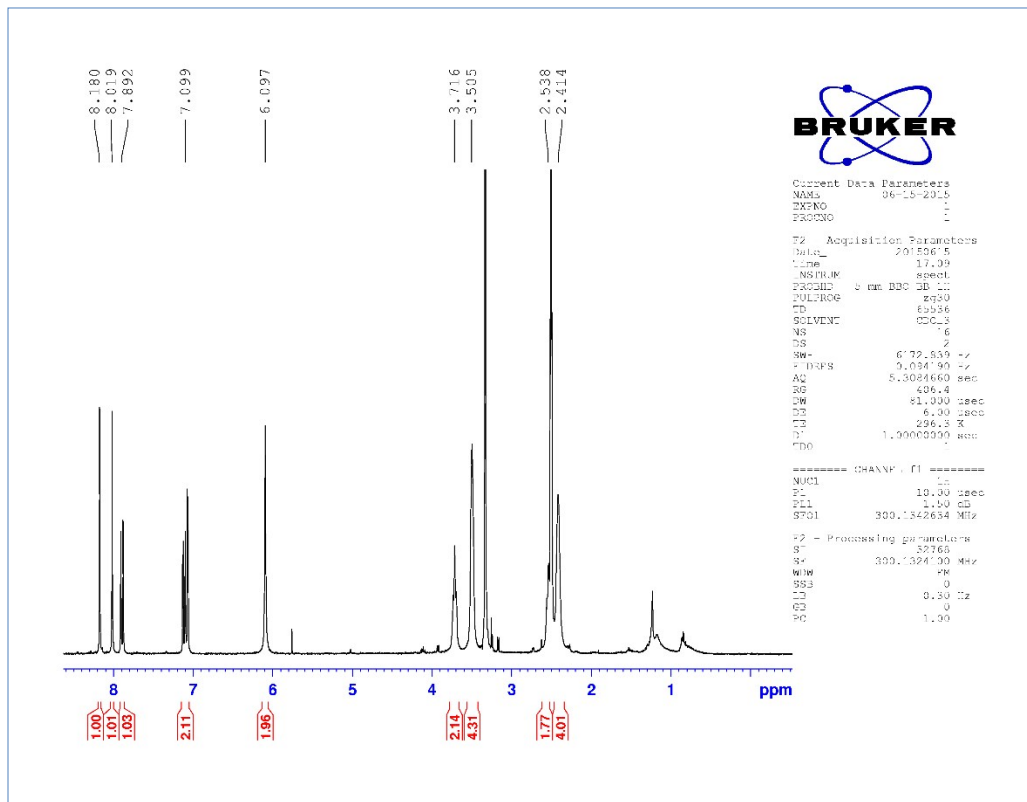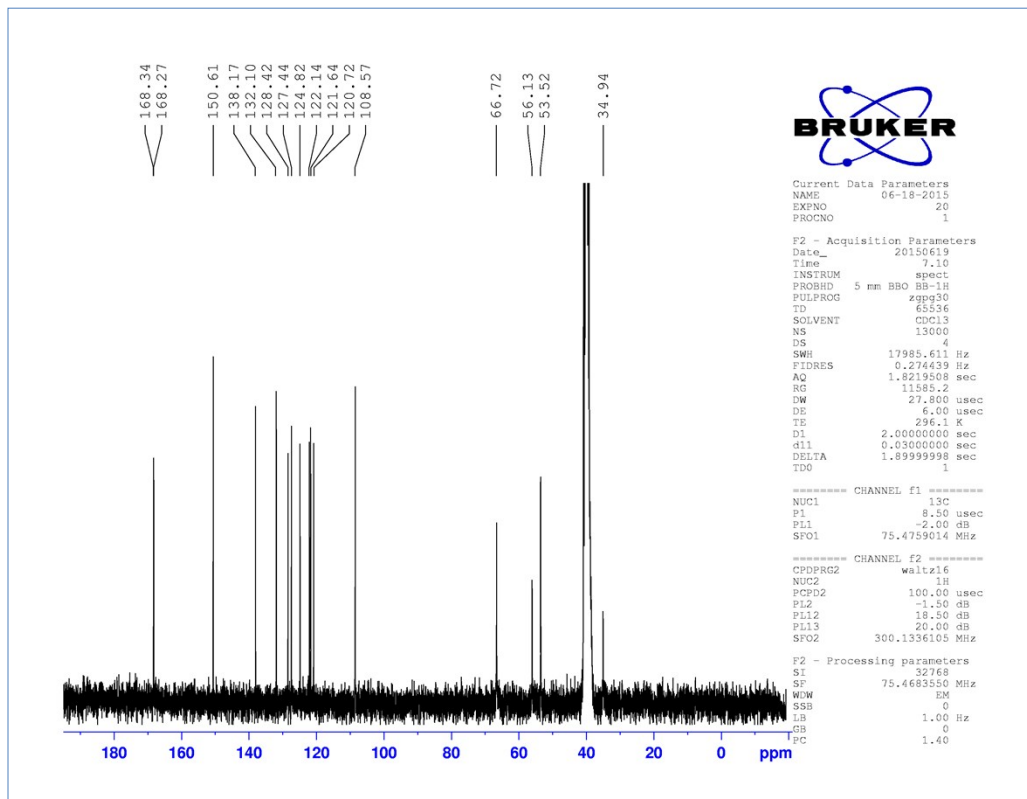

# AHS

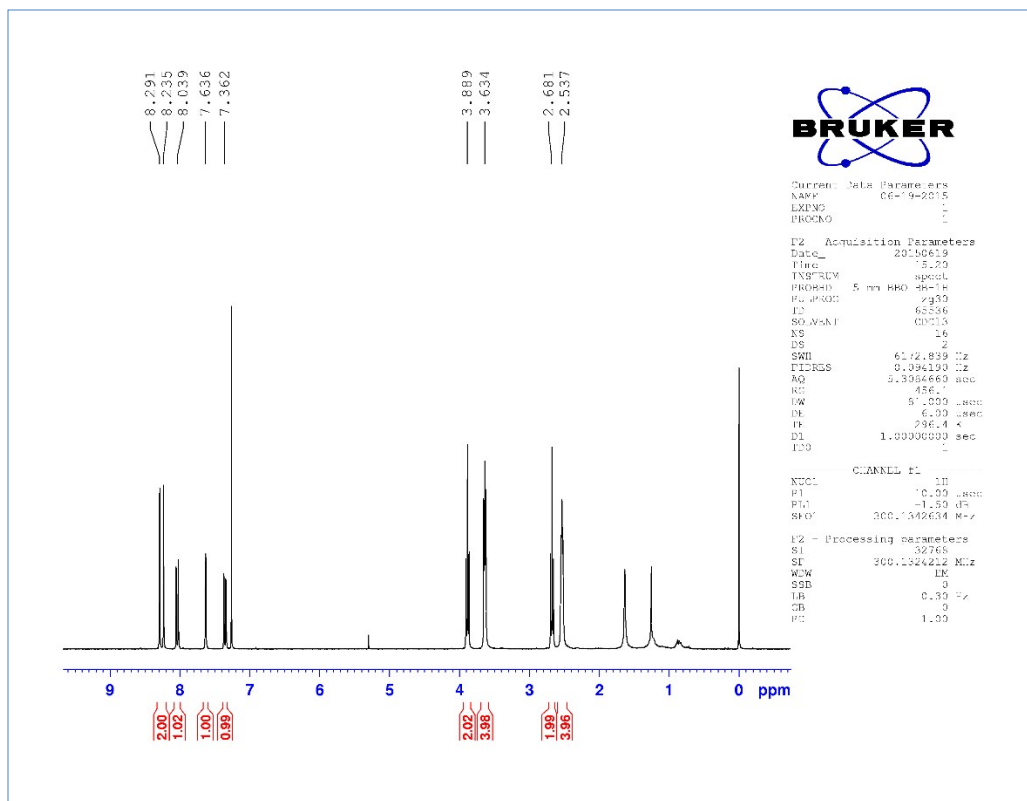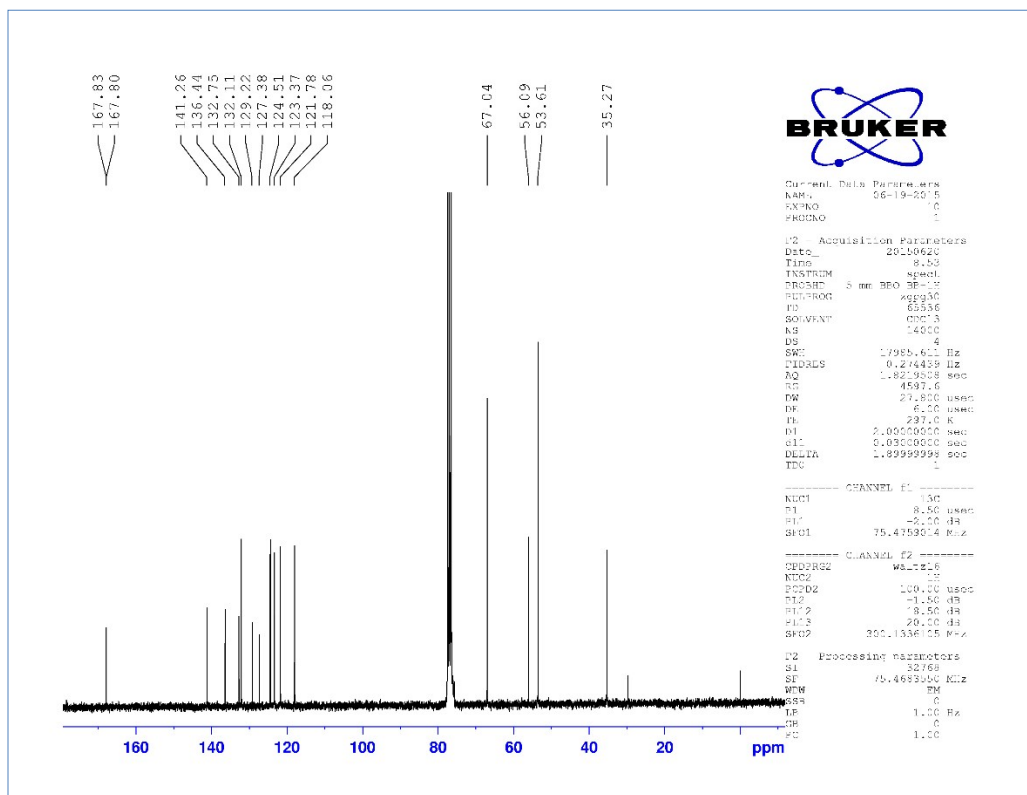

# HRMS for NHS

## Elemental Composition Report

Page 1

### Multiple Mass Analysis: 4 mass(es) processed

Tolerance = 15.0 PPM / DBE: min = -1.5, max = 50.0

Isotope cluster parameters: Separation = 1.0 Abundance = 1.0%

Monoisotopic Mass, Odd and Even Electron Ions

8444 formula(e) evaluated with 49 results within limits (all results (up to 1000) for each mass)

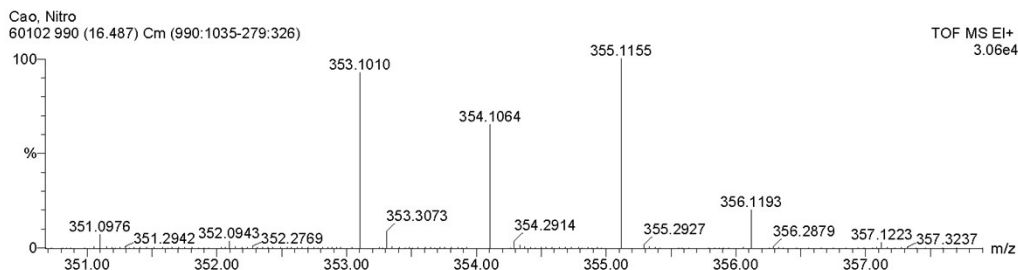

Minimum: 20.00  
Maximum: 100.00

| Mass     | RA     | Calc. Mass | mDa      | PPM      | DBE  | Score               | Formula             |                     |                  |
|----------|--------|------------|----------|----------|------|---------------------|---------------------|---------------------|------------------|
| 353.1010 | 92.72  | 353.1012   | -0.2     | -0.5     | 13.0 | n/a                 | 12C18 H15 N3 O5     |                     |                  |
|          |        | 353.1007   | 0.3      | 0.8      | 17.5 | n/a                 | 12C22 13C H14 N O3  |                     |                  |
|          |        | 353.0998   | 1.2      | 3.3      | 13.5 | n/a                 | 12C16 H13 N6 O4     |                     |                  |
|          |        | 353.1025   | -1.5     | -4.3     | 12.5 | n/a                 | 12C20 H17 O6        |                     |                  |
|          |        | 353.0994   | 1.6      | 4.6      | 18.0 | n/a                 | 12C20 13C H12 N4 O2 |                     |                  |
|          |        | 353.1034   | -2.4     | -6.8     | 22.0 | n/a                 | 12C25 13C H12 N2    |                     |                  |
|          |        | 353.1039   | -2.9     | -8.1     | 17.5 | n/a                 | 12C21 H13 N4 O2     |                     |                  |
|          |        | 353.0980   | 3.0      | 8.4      | 13.0 | n/a                 | 12C19 13C H16 O6    |                     |                  |
|          |        | 353.1052   | -4.2     | -11.9    | 17.0 | n/a                 | 12C23 H15 N O3      |                     |                  |
|          |        | 353.0967   | 4.3      | 12.2     | 13.5 | n/a                 | 12C17 13C H14 N3 O5 |                     |                  |
|          |        | 353.0966   | 4.4      | 12.3     | 21.5 | n/a                 | 12C27 H13 O         |                     |                  |
|          |        | 354.1064   | 65.13    | 354.1059 | 0.5  | 1.5                 | 12.5                | n/a                 | 12C19 13C H17 O6 |
|          |        | 354.1072   |          | -0.8     | -2.3 | 17.5                | n/a                 | 12C20 13C H13 N4 O2 |                  |
|          |        | 354.1077   |          | -1.3     | -3.5 | 13.0                | n/a                 | 12C16 H14 N6 O4     |                  |
| 354.1045 | 1.9    | 5.3        |          | 13.0     | n/a  | 12C17 13C H15 N3 O5 |                     |                     |                  |
| 354.1045 | 1.9    | 5.5        |          | 21.0     | n/a  | 12C27 H14 O         |                     |                     |                  |
| 354.1085 | -2.1   | -6.1       |          | 17.0     | n/a  | 12C22 13C H15 N O3  |                     |                     |                  |
| 354.1090 | -2.6   | -7.3       |          | 12.5     | n/a  | 12C18 H16 N3 O5     |                     |                     |                  |
| 354.1032 | 3.2    | 9.1        |          | 13.5     | n/a  | 12C15 13C H13 N6 O4 |                     |                     |                  |
| 354.1031 | 3.3    | 9.3        |          | 21.5     | n/a  | 12C25 H12 N3        |                     |                     |                  |
| 354.1103 | -3.9   | -11.1      |          | 12.0     | n/a  | 12C20 H18 O6        |                     |                     |                  |
| 354.1112 | -4.8   | -13.6      |          | 21.5     | n/a  | 12C25 13C H13 N2    |                     |                     |                  |
| 354.1117 | -5.3   | -14.9      |          | 17.0     | n/a  | 12C21 H14 N4 O2     |                     |                     |                  |
| 355.1155 | 100.00 | 355.1155   |          | 0.0      | 0.1  | 12.5                | n/a                 | 12C16 H15 N6 O4     |                  |
| 355.1150 |        | 0.5        |          | 1.3      | 17.0 | n/a                 | 12C20 13C H14 N4 O2 |                     |                  |
| 355.1164 |        | -0.9       | -2.5     | 16.5     | n/a  | 12C22 13C H16 N O3  |                     |                     |                  |
| 355.1168 |        | -1.3       | -3.7     | 12.0     | n/a  | 12C18 H17 N3 O5     |                     |                     |                  |
| 355.1137 |        | 1.8        | 5.1      | 12.0     | n/a  | 12C19 13C H18 O6    |                     |                     |                  |
| 355.1182 |        | -2.7       | -7.5     | 11.5     | n/a  | 12C20 H19 O6        |                     |                     |                  |
| 355.1124 |        | 3.1        | 8.9      | 12.5     | n/a  | 12C17 13C H16 N3 O5 |                     |                     |                  |
| 355.1123 |        | 3.2        | 9.0      | 20.5     | n/a  | 12C27 H15 O         |                     |                     |                  |
| 355.1191 |        | -3.6       | -10.0    | 21.0     | n/a  | 12C25 13C H14 N2    |                     |                     |                  |
| 355.1195 |        | -4.0       | -11.3    | 16.5     | n/a  | 12C21 H15 N4 O2     |                     |                     |                  |
| 355.1110 |        | 4.5        | 12.6     | 13.0     | n/a  | 12C15 13C H14 N6 O4 |                     |                     |                  |
| 355.1109 |        | 4.6        | 12.8     | 21.0     | n/a  | 12C25 H13 N3        |                     |                     |                  |
| 356.1193 |        | 20.03      | 356.1188 | 0.5      | 1.3  | 12.5                | n/a                 | 12C15 13C H15 N6 O4 |                  |
| 356.1188 |        |            | 0.5      | 1.5      | 20.5 | n/a                 | 12C25 H14 N3        |                     |                  |
| 356.1201 | -0.8   |            | -2.3     | 20.0     | n/a  | 12C27 H16 O         |                     |                     |                  |
| 356.1202 | -0.9   |            | -2.5     | 12.0     | n/a  | 12C17 13C H17 N3 O5 |                     |                     |                  |
| 356.1215 | -2.2   |            | -6.2     | 11.5     | n/a  | 12C19 13C H19 O6    |                     |                     |                  |
| 356.1161 | 3.2    |            | 9.0      | 16.0     | n/a  | 12C22 H16 N2 O3     |                     |                     |                  |
| 356.1229 | -3.6   |            | -10.0    | 16.5     | n/a  | 12C20 13C H15 N4 O2 |                     |                     |                  |
| 356.1156 | 3.7    |            | 10.3     | 20.5     | n/a  | 12C26 13C H15 O     |                     |                     |                  |
| 356.1233 | -4.0   |            | -11.2    | 12.0     | n/a  | 12C16 H16 N6 O4     |                     |                     |                  |
| 356.1147 | 4.6    |            | 12.8     | 16.5     | n/a  | 12C20 H14 N5 O2     |                     |                     |                  |
| 356.1242 | -4.9   |            | -13.8    | 16.0     | n/a  | 12C22 13C H17 N O3  |                     |                     |                  |
| 356.1143 | 5.0    |            | 14.0     | 21.0     | n/a  | 12C24 13C H13 N3    |                     |                     |                  |



# HRMS for AHS

## Elemental Composition Report

Page 1

Tolerance = 15.0 PPM / DBE: min = -1.5, max = 50.0  
Isotope cluster parameters: Separation = 1.0 Abundance = 1.0%

Monoisotopic Mass, Odd and Even Electron Ions  
1576 formula(e) evaluated with 8 results within limits (all results (up to 1000) for each mass)

Cao, Azide  
60103 656 (10.936) AM (Cen, 6, 90.00, Ht, 7000.0, 0.00, 0.69); Cm (597.689-91.213)

TOF MS EI+  
9.41e4

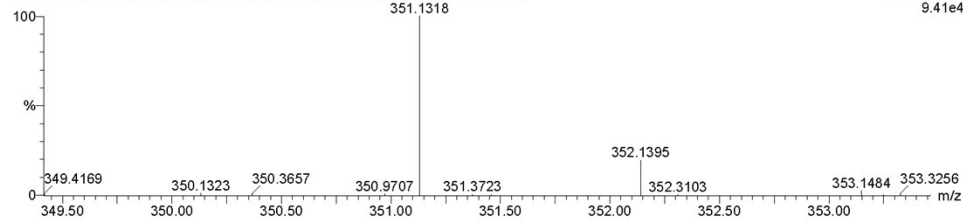

Minimum: 20.00  
Maximum: 100.00

| Mass     | RA     | Calc. Mass | mDa  | PPM   | DBE  | Score | Formula             |
|----------|--------|------------|------|-------|------|-------|---------------------|
| 351.1318 | 100.00 | 351.1313   | 0.5  | 1.3   | 18.0 | n/a   | 12C20 13C H14 N6    |
|          |        | 351.1327   | -0.9 | -2.5  | 17.5 | n/a   | 12C22 13C H16 N3 O  |
|          |        | 351.1331   | -1.3 | -3.8  | 13.0 | n/a   | 12C18 H17 N5 O3     |
|          |        | 351.1300   | 1.8  | 5.1   | 13.0 | n/a   | 12C19 13C H18 N2 O4 |
|          |        | 351.1340   | -2.2 | -6.4  | 17.0 | n/a   | 12C24 13C H18 O2    |
|          |        | 351.1345   | -2.7 | -7.6  | 12.5 | n/a   | 12C20 H19 N2 O4     |
|          |        | 351.1287   | 3.1  | 8.9   | 13.5 | n/a   | 12C17 13C H16 N5 O3 |
|          |        | 351.1358   | -4.0 | -11.4 | 17.5 | n/a   | 12C21 H15 N6        |
